# Supplementary material
Source: publisher site journal article supplement (https://www.dovepress.com/article/143358)

## Supplementary material

**Table S1** Summary of all medication administered during and prior to hospitalization

|                                                   |              |
|---------------------------------------------------|--------------|
| <b>Medications during treatment, n (%)</b>        | 4226 (98.65) |
| Antimicrobials                                    | 3944 (92.06) |
| Vasoprotectives                                   | 2586 (60.36) |
| Cardiac therapy                                   | 2142 (50.00) |
| Antithrombotic agents                             | 1962 (45.60) |
| Anti-inflammatory and antirheumatic products      | 1373 (32.05) |
| Antineoplastic agents                             | 284 (6.63)   |
| Immunostimulants                                  | 427 (9.97)   |
| Immunosuppressants                                | 21 (0.49)    |
| <b>Medication prior to hospitalization, n (%)</b> | 1669 (38.96) |
| Calcium channel blockers                          | 683 (15.94)  |
| Agents acting on the renin-angiotensin system     | 439 (10.25)  |
| Drugs used in diabetes                            | 404 (9.43)   |
| Beta blocking agents                              | 350 (8.17)   |
| Antithrombotic agents                             | 206 (4.81)   |
| Cardiac therapy                                   | 177 (4.13)   |
| Stomatological preparations                       | 154 (3.59)   |
| Diuretics                                         | 150 (3.5)    |
| Analgesics                                        | 139 (3.24)   |
| Lipid modifying agents                            | 138 (3.22)   |
| Antibacterials                                    | 143 (3.34)   |
| Urologicals                                       | 90 (2.1)     |

**Table S2** The top 20 frequent first-time use antibiotics

| <b>Drug</b>                         | <b>Hospitalizations, n (%)</b> |
|-------------------------------------|--------------------------------|
|                                     | <b>N*=3834</b>                 |
| <b>Cephalosporin 1st generation</b> | 65 (1.69)                      |
| Cefathiamidine                      | 56 (1.46)                      |
| <b>Cephalosporin 2nd generation</b> | 292 (7.61)                     |
| Cefuroxime                          | 191 (4.98)                     |
| Cefamandole                         | 81 (2.11)                      |
| <b>Cephalosporin 3rd generation</b> | 1415 (36.90)                   |
| Cefixime                            | 595 (15.52)                    |
| Cefoperazone and tazobactam         | 338 (8.82)                     |
| Cefoperazone and sulbactam          | 147 (3.83)                     |
| Ceftriaxone                         | 80 (2.09)                      |
| Moxalactam                          | 74 (1.93)                      |
| Cefodizime                          | 74 (1.93)                      |
| Ceftizoxime                         | 41 (1.07)                      |
| <b>Fluoroquinolones</b>             | 1087 (28.35)                   |
| Levofloxacin                        | 963 (25.12)                    |
| Moxifloxacin                        | 75 (1.96)                      |
| Ciprofloxacin                       | 39 (1.02)                      |
| <b>Penicillin combination</b>       | 277 (7.22)                     |
| Piperacillin and sulbactam          | 188 (4.90)                     |
| Piperacillin and tazobactam         | 38 (0.99)                      |
| <b>Carbapenems</b>                  | 150 (3.91)                     |
| Imipenem and cilastatin             | 150 (3.91)                     |
| <b>Nitroimidazole</b>               | 202 (5.27)                     |

|                            |            |
|----------------------------|------------|
| Ornidazole                 | 134 (3.50) |
| Metronidazole              | 68 (1.77)  |
| Ceftriaxone and tazobactam | 58 (1.51)  |
| <b>Aminoglycoside</b>      | 88 (2.28)  |
| Amikacin                   | 46 (1.20)  |
| <b>Macrolides</b>          | 44 (1.14)  |
| Azithromycin               | 38 (0.99)  |

---

**Note:** N\* represents the total number of hospitalization cases with antibiotics treatment of UTI.

**Table S3** The 20 most frequent overall antibiotics during the whole hospitalization

| <b>Drug</b>                         | <b>Hospitalizations, n (%)</b> |
|-------------------------------------|--------------------------------|
|                                     | <b>N*=3834</b>                 |
| <b>Fluoroquinolones</b>             | 1363 (35.55)                   |
| Levofloxacin                        | 1161 (30.28)                   |
| Moxifloxacin                        | 152 (3.96)                     |
| Ciprofloxacin                       | 121 (3.16)                     |
| <b>Cephalosporin 2nd generation</b> | 522 (13.61)                    |
| Cefuroxime                          | 278 (7.25)                     |
| Cefamandole                         | 177 (4.62)                     |
| <b>Cephalosporin 3rd generation</b> | 2303 (60.07)                   |
| Cefoperazone and tazobactam         | 800 (20.87)                    |
| Cefixime                            | 740 (19.30)                    |
| Cefoperazone and sulbactam          | 498 (12.99)                    |
| Ceftriaxone                         | 227 (5.92)                     |
| Cefodizime                          | 212 (5.53)                     |
| Ceftriaxone and tazobactam          | 159 (4.15)                     |
| Ceftizoxime                         | 158 (4.12)                     |
| Moxalactam                          | 148 (3.86)                     |
| <b>Penicillin combination</b>       | 701 (18.28)                    |
| Piperacillin and sulbactam          | 381 (9.94)                     |
| Piperacillin and tazobactam         | 225 (5.87)                     |
| <b>Carbapenems</b>                  | 416 (10.85)                    |
| Imipenem and cilastatin             | 379 (9.89)                     |
| <b>Nitroimidazole</b>               | 366 (9.55)                     |
| Ornidazole                          | 232 (6.05)                     |
| Metronidazole                       | 186 (4.85)                     |

|                   |            |
|-------------------|------------|
| <b>Macrolides</b> | 152 (3.96) |
| Azithromycin      | 117 (3.05) |
| <b>Vancomycin</b> | 151 (3.94) |
| Vancomycin        | 107 (2.79) |

---

**Note:** N\* represents the total number of hospitalization cases with antibiotics treatment of UTI.

**Table S4** Summary of log-rank test statistics for stratified variables

| Stratified variables           | Log-rank chi-squared test | P value |
|--------------------------------|---------------------------|---------|
| Sex                            | 41.3                      | <0.001  |
| Age ([18,30],[30,60],[60,100]) | 300                       | 0       |
| Marriage (Married or not)      | 63.8                      | <0.001  |
| Diabetes                       | 46.2                      | <0.001  |
| Kidney stone                   | 0.1                       | 0.719   |
| Renal insufficiency            | 31.7                      | <0.001  |
| Surgery history                | 9.1                       | 0.0026  |

Figure S1

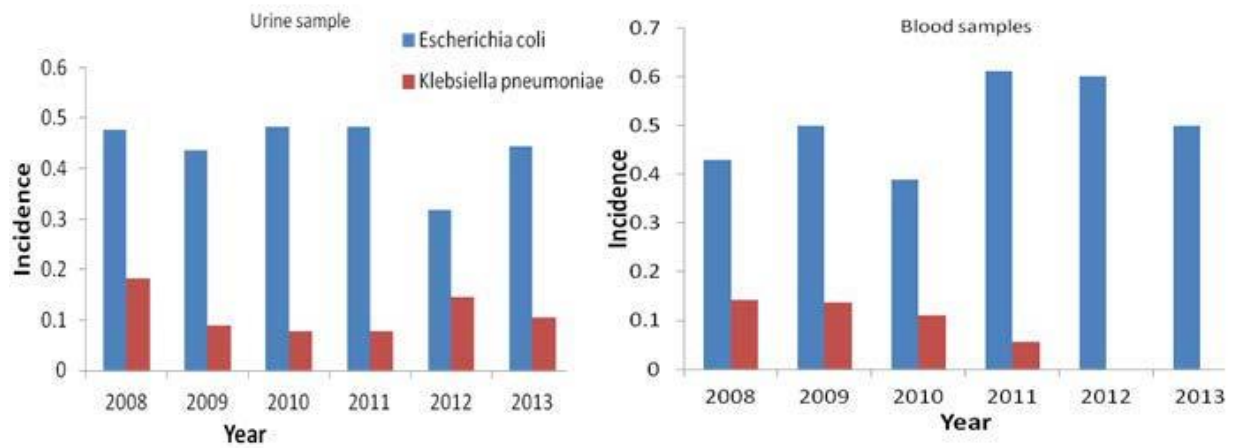

Figure S2

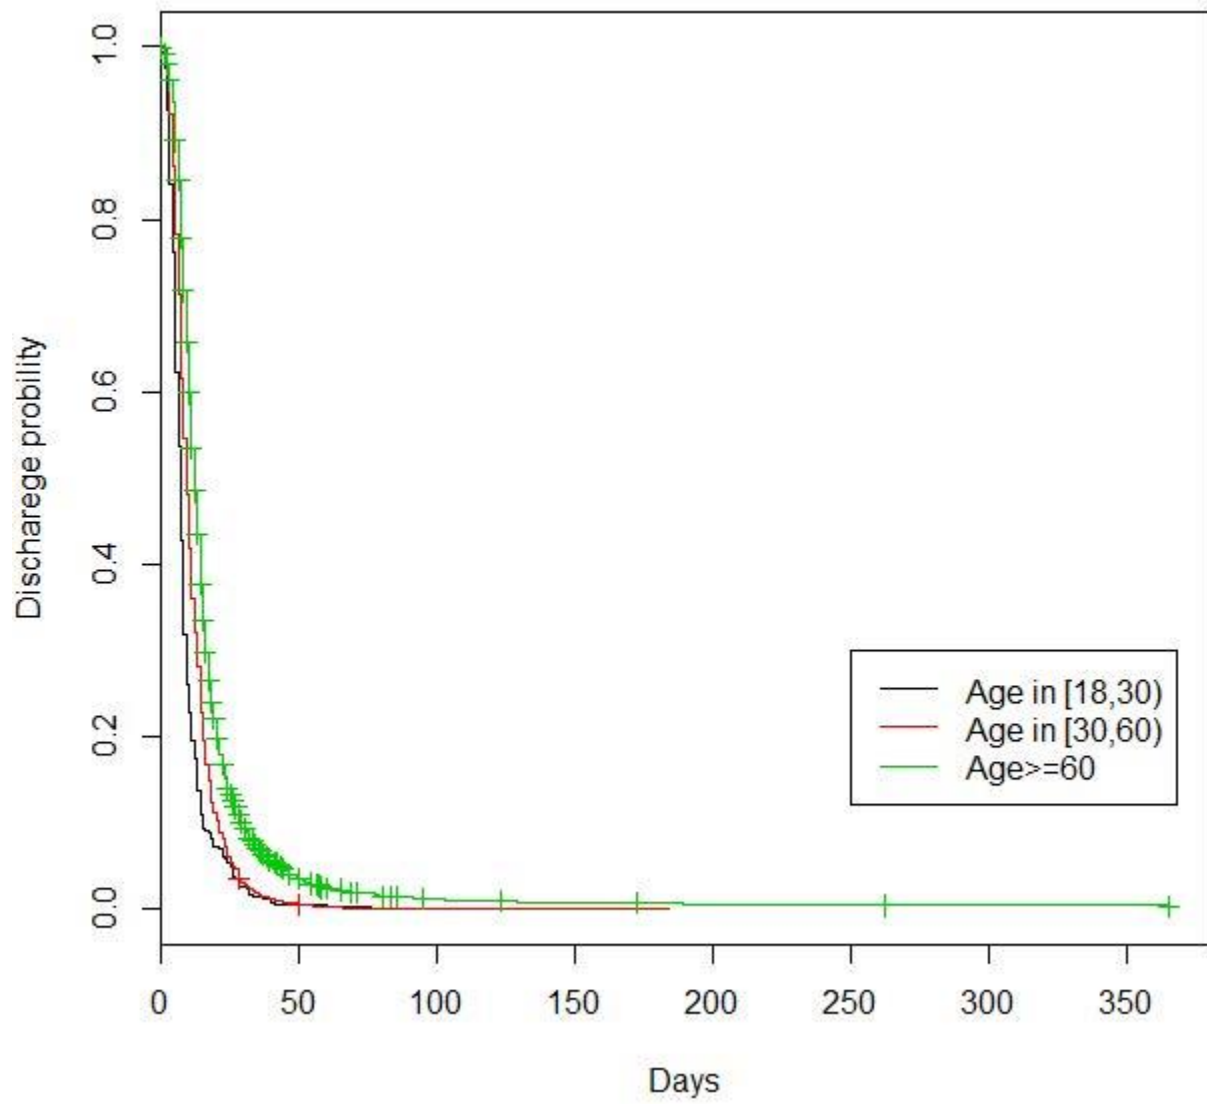

Supplement: Supplementary file 1 [file get_supplementary_file.php]
